# Supplementary material for: Efficient circularly polarized multiple resonance thermally activated delayed fluorescence from B,N-embedded hetero[8]helicene enantiomers
Source: Royal Society of Chemistry journal article supplement (doi:10.1039/d4sc03854a), 2024-01-01
Supplement: d4sc03854a2.pdf [file d4sc03854a2.pdf]

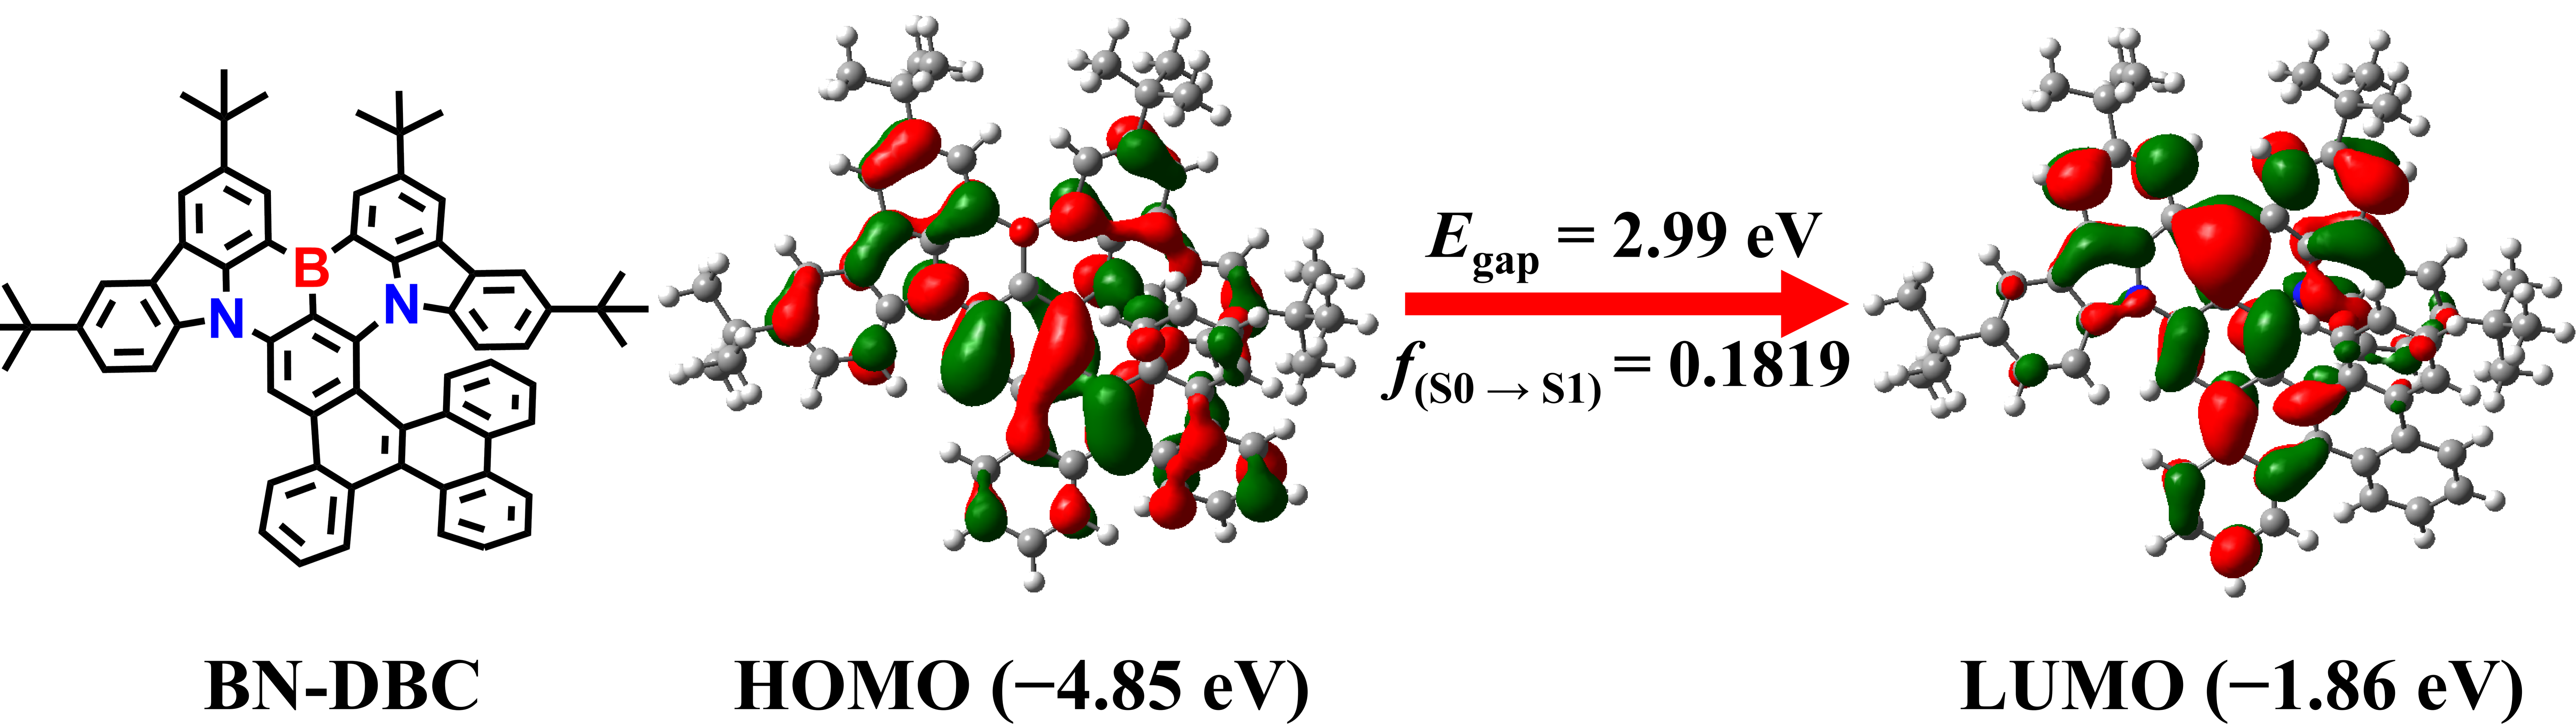

**Figure S9.** HOMO and LUMO distributions, HOMO–LUMO energy level gap, and oscillator strength of BN-DBC.

# (P)-BN-TP-ICz

Energy

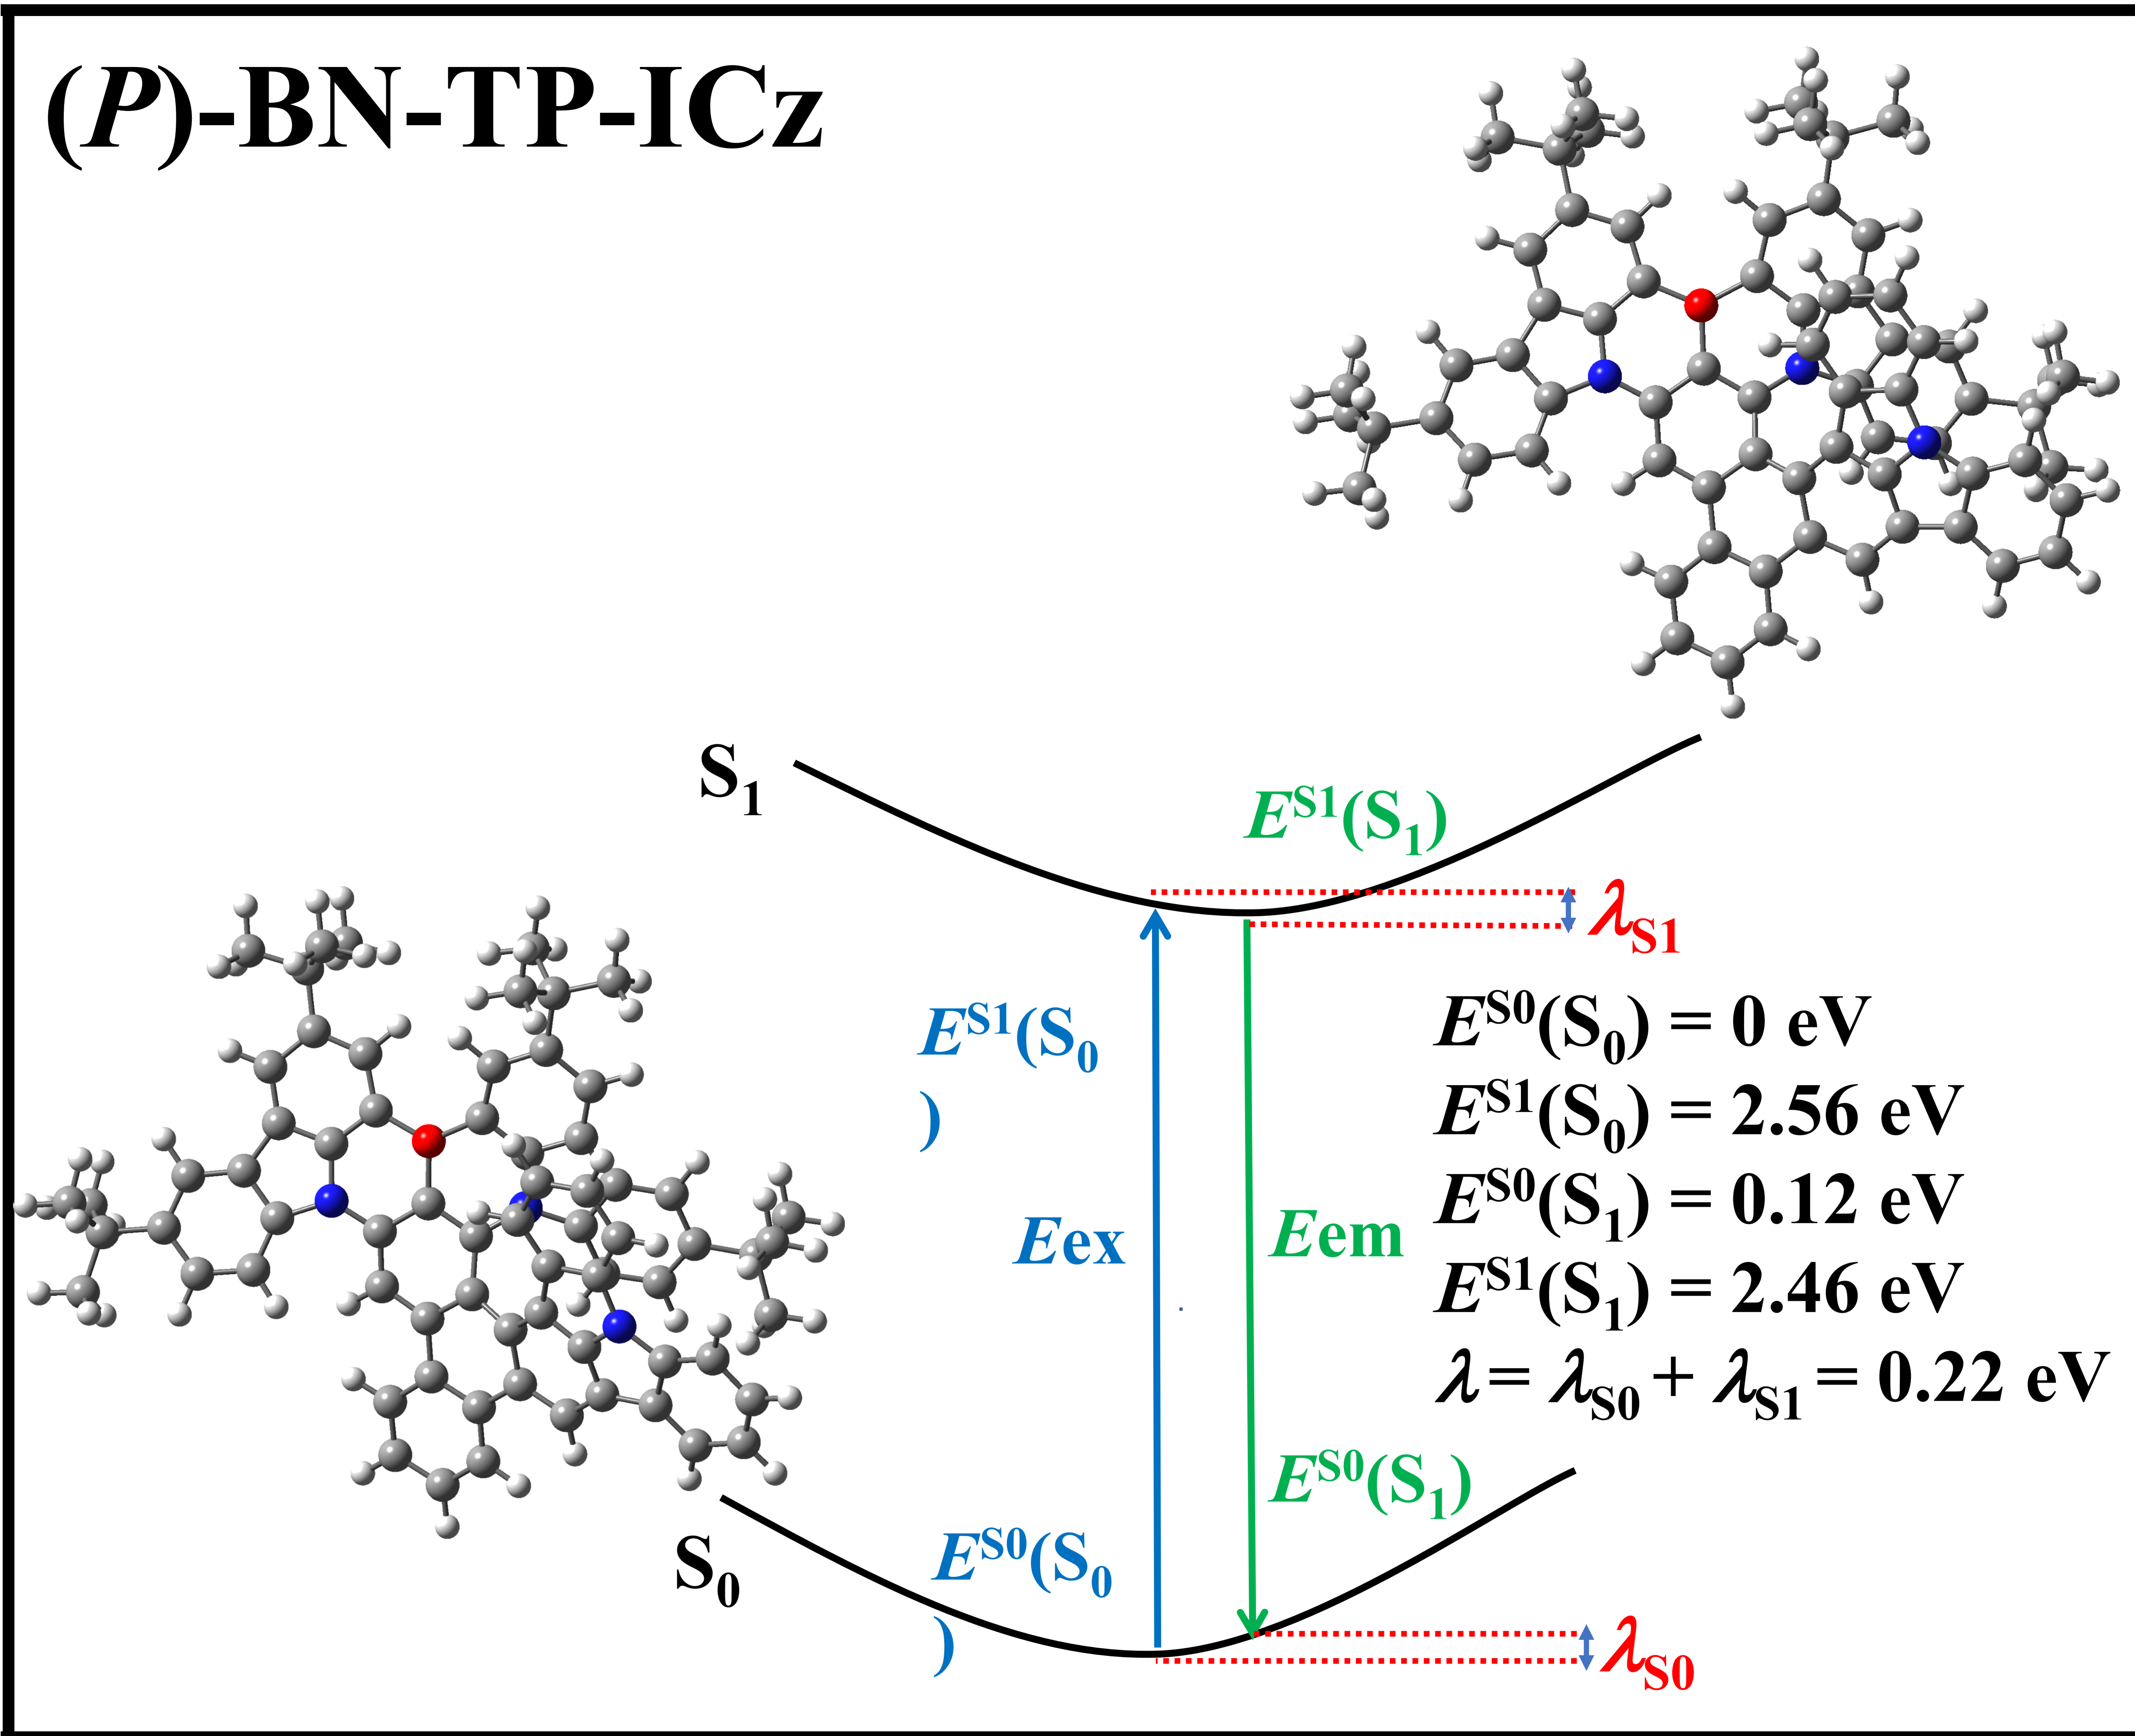

Geometry

**Figure S22.** Optimized  $S_0$  and  $S_1$  structures, single point energy, and reorganization energy ( $\lambda$ ) of (P)-BN-TP-ICz.
